# Supplementary material
Source: bioRxiv or medRxiv preprint supplement (https://www.biorxiv.org/highwire/filestream/34219/field_highwire_adjunct_files/0/117424-1.pdf)
Supplement: Supplementary file [file 117424-1.pdf]

## ***Supporting information***

**MS title:** Colonization history of the Western Corn Rootworm (*Diabrotica virgifera virgifera*) in North America: insights from random forest ABC using microsatellite data

**Authors:** Eric Lombaert, Marc Ciosi, Nicholas J. Miller, Thomas W. Sappington, Aurélie Blin & Thomas Guillemaud

|                  |             |
|------------------|-------------|
| <i>Figure S1</i> | <i>p. 2</i> |
| <i>Figure S2</i> | <i>p. 3</i> |
| <i>Figure S3</i> | <i>p. 4</i> |
| <i>Table S1</i>  | <i>p. 5</i> |
| <i>Table S2</i>  | <i>p. 6</i> |
| <i>Table S3</i>  | <i>p. 7</i> |
| <i>Table S4</i>  | <i>p. 8</i> |
| <i>Table S5</i>  | <i>p. 9</i> |

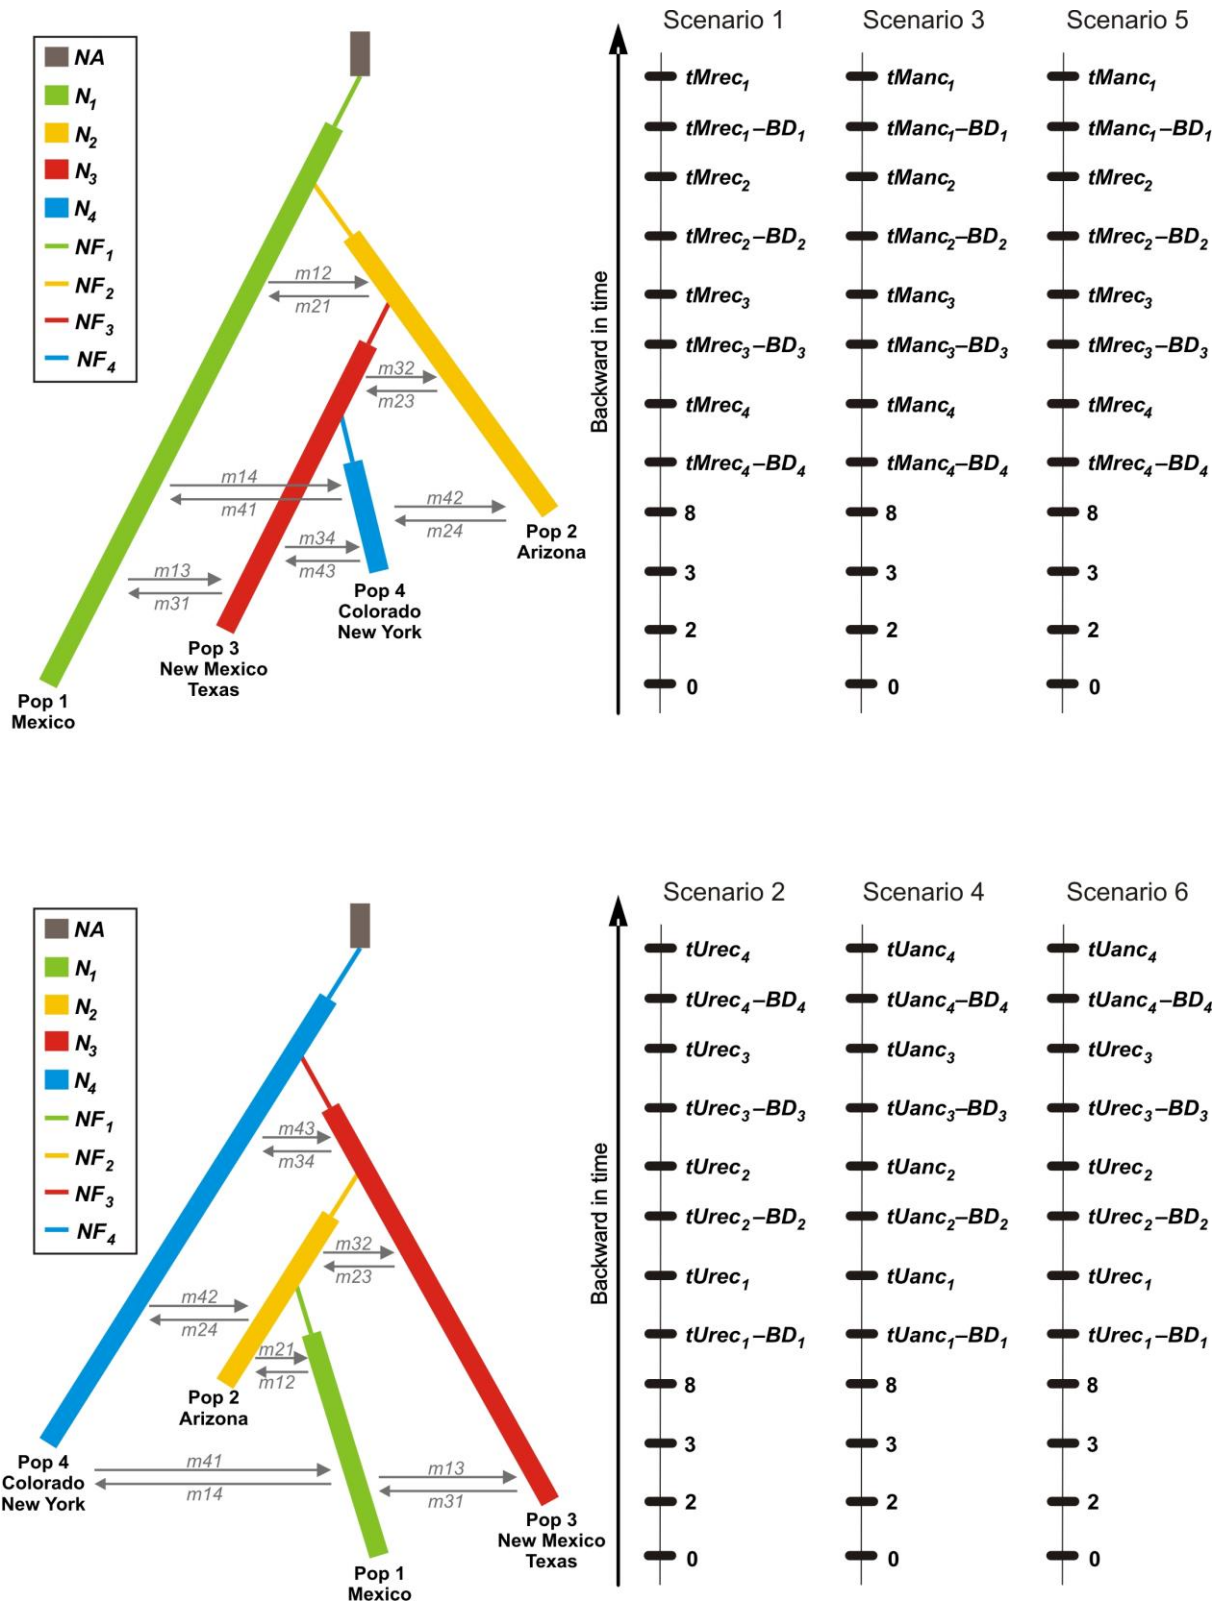

**Figure S1:** Graphical representation of the 6 competing scenarios considered to infer the colonization history of *Diabrotica virgifera virgifera* in North America in the ABC analyses.

Note: the four genetic units are those inferred from Bayesian clustering analyses, as presented in Figure 1. All parameters with associated prior distributions are described in Table S2. Time 0 is the sampling year 2006, and all other times are in number of generations before 2006, assuming 1 generation per year. Time is not to scale. The directions of the migration rates represent migration from one population to another backward in time.

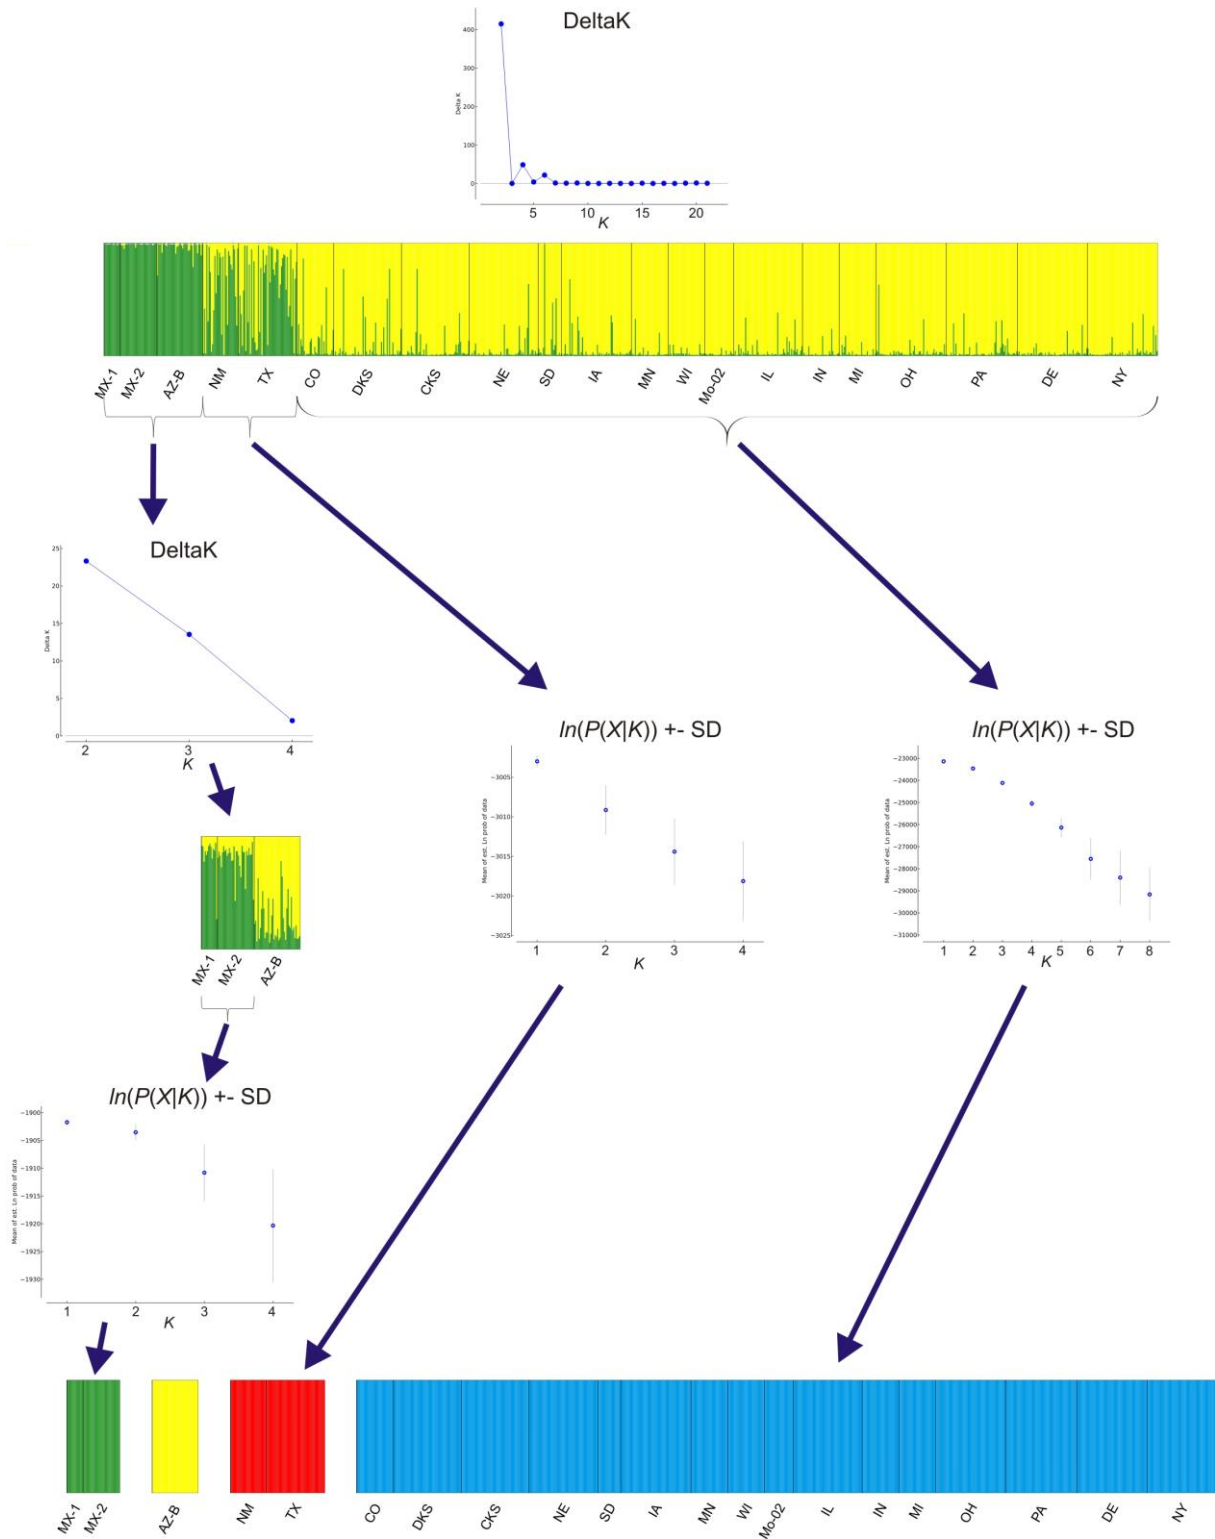

**Figure S2:** Q plots representing hierarchical data analyses performed with STRUCTURE to determine the number of genetic units among *Diabrotica virgifera virgifera* individuals sampled from the North American distribution of the species. Each Q plot shown for each analysis was generated using the value of  $K$  associated with either the  $\ln(P(X|K))$  when it was maximum for  $K=1$ , or the maximum  $\Delta K$  value (Evanno *et al.* 2005, *Molecular Ecology*, 14, 2611-2620) otherwise. Arrows indicate subsequent independent hierarchical analyses. Each vertical line represents an individual and each color represents a genetic cluster. Names of site samples are as in Figure 1 and Table S1. Consensus STRUCTURE plots were generated using the CLUMPAK method (Kopelman *et al.* 2015, *Molecular Ecology Resources*, 15, 1179-1191) and final plots were built with DISTRUCT (Rosenberg 2004, *Molecular Ecology Resources*, 4, 137-138).



| Site sample | Country | State        | Longitude | Latitude | Sampling year | Collector        | Previous publications | Sample size | NA    | AR    | He    | $F_{IS}$ |
|-------------|---------|--------------|-----------|----------|---------------|------------------|-----------------------|-------------|-------|-------|-------|----------|
| MX-1        | Mexico  | Durango      | -96.723   | 17.059   | 2001          | Rosanna Giordano | B                     | 14          | 6.692 | -     | 0.73  | 0.1093 * |
| MX-2        | Mexico  | Durango      | -103.914  | 20.154   | 2006          | Stefan Toepfer   | -                     | 32          | 9.231 | 7.906 | 0.707 | 0.1067 * |
| AZ-B        | USA     | Arizona      | -104.417  | 24.000   | 1998          | Rosanno Giordano | B                     | 40          | 7.846 | 6.506 | 0.665 | 0.0297   |
| NM          | USA     | New Mexico   | -104.000  | 24.468   | 2004          | Uwe Stoltz       | -                     | 31          | 7.231 | 6.276 | 0.621 | -0.0081  |
| TX          | USA     | Texas        | -109.731  | 32.064   | 2004          | Greg Cronholm    | A, B, C, D            | 51          | 7.462 | 6.258 | 0.649 | -0.0043  |
| CO          | USA     | Colorado     | -106.125  | 34.853   | 2003          | Uwe Stoltz       | -                     | 32          | 6.231 | 5.559 | 0.603 | -0.0321  |
| DKS         | USA     | Kansas       | -101.837  | 33.737   | 2003          | Lee French       | A, C                  | 59          | 6.615 | 5.514 | 0.603 | 0.0363   |
| CKS         | USA     | Kansas       | -104.149  | 40.185   | 2003          | Lee French       | A                     | 59          | 6.462 | 5.448 | 0.607 | 0.0226   |
| NE          | USA     | Nebraska     | -100.016  | 37.765   | 2003          | Lance Meinke     | A                     | 60          | 6.615 | 5.483 | 0.595 | -0.0236  |
| SD          | USA     | South Dakota | -97.657   | 39.572   | 2005          | Uwe Stoltz       | -                     | 20          | 5.769 | 5.671 | 0.616 | -0.0001  |
| IA          | USA     | Iowa         | -96.488   | 41.229   | 2003          | Brendon Reardon  | A, C, D               | 61          | 6.692 | 5.442 | 0.604 | 0.0021   |
| MN          | USA     | Minnesota    | -96.267   | 43.611   | 2003          | Uwe Stoltz       | -                     | 32          | 5.538 | 5.042 | 0.591 | 0.0450   |
| WI          | USA     | Wisconsin    | -93.600   | 41.732   | 2003          | Uwe Stoltz       | -                     | 32          | 6.154 | 5.524 | 0.6   | 0.0554   |
| Mo-02       | USA     | Illinois     | -92.173   | 43.950   | 2002          | Sue Ratcliff     | -                     | 25          | 5.615 | 5.315 | 0.572 | 0.0232   |
| IL          | USA     | Illinois     | -90.945   | 43.870   | 2003          | Eli Levine       | A, B, C, D            | 60          | 6.385 | 5.396 | 0.624 | 0.0310   |
| IN          | USA     | Indiana      | -90.647   | 40.911   | 2003          | Uwe Stoltz       | -                     | 32          | 6.154 | 5.613 | 0.609 | -0.0337  |
| MI          | USA     | Michigan     | -88.243   | 40.116   | 2003          | Uwe Stoltz       | -                     | 32          | 5.923 | 5.272 | 0.595 | 0.0270   |
| OH          | USA     | Ohio         | -85.833   | 39.575   | 2003          | Bruce Eisley     | A                     | 61          | 6.846 | 5.523 | 0.607 | 0.0095   |
| PA          | USA     | Pennsylvania | -85.666   | 42.749   | 2003          | Dennis Calvin    | A, B                  | 62          | 6.462 | 5.310 | 0.612 | 0.0230   |
| DE          | USA     | Delaware     | -81.901   | 40.447   | 2003          | Joanne Whalen    | A                     | 61          | 6.154 | 5.254 | 0.601 | 0.0143   |
| NY          | USA     | New York     | -77.765   | 40.913   | 2003          | Ken Wise         | A, C, D               | 61          | 6.462 | 5.394 | 0.597 | 0.0053   |

**Table S1:** Description of *Diabrotica virgifera virgifera* samples and within-population genetic variation.

NA: mean number of alleles per locus. AR: allelic richness corrected for 18 individuals; MX-1 was excluded from this analysis because of low sample size. He: mean expected heterozygosity. Asterisks indicate significant Hardy-Weinberg tests. Publication codes: A = Kim & Sappington 2005, *Environmental Entomology*, 34, 494-503; B = Ciosi *et al.* 2008, *Molecular Ecology*, 17, 3614-3627; C = Kim *et al.* 2008, *Journal of Heredity*, 99, 112-124; D = Coates *et al.* 2009, *Journal of Heredity*, 100, 556-564. "-": not applicable.

| Parameters         | Distribution                                      | Quantile<br>2.5%     | Median               | Mean                 | Quantile<br>97.5%    |
|--------------------|---------------------------------------------------|----------------------|----------------------|----------------------|----------------------|
| $NA; N_i$          | Log-Uniform<br>[100 – 100,000]                    | 119                  | 3,165                | 14,450               | 84,068               |
| $NF_i$             | Log-Uniform<br>[2 – 100]                          | 2                    | 14                   | 25                   | 90                   |
| $BD_i$             | Uniform<br>[1 – 10]                               | 1                    | 5                    | 5.05                 | 10                   |
| $mig_{ij}$         | Uniform<br>[0 – 5x10 <sup>-4</sup> ]              | 1.3x10 <sup>-5</sup> | 2.5x10 <sup>-4</sup> | 2.5x10 <sup>-4</sup> | 4.9x10 <sup>-4</sup> |
| $tManc_i; tUanc_i$ | Uniform<br>[ $x_i$ – 10,000]                      | DV                   | DV                   | DV                   | DV                   |
| $tMrec_i; tUrec_i$ | Log-Uniform<br>[ $x_i$ – 1,500]                   | DV                   | DV                   | DV                   | DV                   |
| mean $\mu$         | Uniform<br>[10 <sup>-5</sup> – 10 <sup>-3</sup> ] | 3.5x10 <sup>-5</sup> | 5.1x10 <sup>-4</sup> | 5.1x10 <sup>-4</sup> | 9.8x10 <sup>-4</sup> |
| mean $P$           | Uniform<br>[0.1 – 0.3]                            | 0.105                | 0.2                  | 0.2                  | 0.295                |

**Table S2:** Prior distributions of demographic, historical and genetic parameters used in ABC analyses processed to retrace the colonization history of *Diabrotica virgifera virgifera* in North America.

Notes:  $NA$  and  $N_i$  = stable effective population size (number of diploid individuals) of the ancestral unsampled population ( $NA$ ) or of population  $i$ ;  $NF_i$  = effective number of founders during a bottleneck lasting  $BD_i$  generation(s) for population  $i$ ;  $mig_{ij}$  = migration rate backward in time from population  $i$  to population  $j$ ;  $tManc_i$  and  $tUanc_i$  = ancient foundation time of population  $i$  in the “Mexico origin” and “central-USA origin” scenarios respectively, with bounds  $x_i$  fixed from date of first observation of population  $i$ ;  $tMrec_i$  and  $tUrec_i$  = recent foundation time of population  $i$  in the “Mexico origin” and “central-USA origin” scenarios respectively, with bounds  $x_i$  fixed from date of first observation of population  $i$ . Depending on the scenarios considered, various conditions were applied to times so that coalescent times fit with each scenario’s topology. All times are expressed in number of generations, which is equivalent to years (because *Diabrotica virgifera virgifera* has 1 generation per year), and run backward in time from time 0 which corresponds to year 2006 CE. The microsatellite loci were assumed to follow a generalized stepwise mutation model (Estoup *et al.* 2002, *Molecular Ecology*, 11, 1591-1604) with two parameters: the mean mutation rate (mean  $\mu$ ), the mean parameter of the geometric distribution (mean  $P$ ) of length in terms of the number of repeats of mutation events. All prior quantities presented were computed from 10<sup>6</sup> values. DV = different values were possible. See Figure S1 for a graphical representation of the evolutionary scenarios with associated historical and demographic parameters considered in the ABC analyses.

| Site sample | MX-1                 | MX-2   | AZ-B   | NM     | TX     | CO     | DKS                   | CKS                   | NE                    | SD                   | IA                    | MN                    | WI                    | Mo-02                 | IL                   | IN                    | MI                   | OH                   | PA                    | DE                   |
|-------------|----------------------|--------|--------|--------|--------|--------|-----------------------|-----------------------|-----------------------|----------------------|-----------------------|-----------------------|-----------------------|-----------------------|----------------------|-----------------------|----------------------|----------------------|-----------------------|----------------------|
| MX-2        | <b><u>0.0022</u></b> |        |        |        |        |        |                       |                       |                       |                      |                       |                       |                       |                       |                      |                       |                      |                      |                       |                      |
| AZ-B        | 0.0516               | 0.0326 |        |        |        |        |                       |                       |                       |                      |                       |                       |                       |                       |                      |                       |                      |                      |                       |                      |
| NM          | 0.1067               | 0.0745 | 0.0567 |        |        |        |                       |                       |                       |                      |                       |                       |                       |                       |                      |                       |                      |                      |                       |                      |
| TX          | 0.0837               | 0.0588 | 0.0416 | 0.0233 |        |        |                       |                       |                       |                      |                       |                       |                       |                       |                      |                       |                      |                      |                       |                      |
| CO          | 0.1247               | 0.1024 | 0.0803 | 0.0160 | 0.0211 |        |                       |                       |                       |                      |                       |                       |                       |                       |                      |                       |                      |                      |                       |                      |
| DKS         | 0.1397               | 0.1100 | 0.0893 | 0.0197 | 0.0229 | 0.0065 |                       |                       |                       |                      |                       |                       |                       |                       |                      |                       |                      |                      |                       |                      |
| CKS         | 0.1397               | 0.1101 | 0.0949 | 0.0266 | 0.0246 | 0.0083 | <b><u>-0.0003</u></b> |                       |                       |                      |                       |                       |                       |                       |                      |                       |                      |                      |                       |                      |
| NE          | 0.1412               | 0.1112 | 0.0911 | 0.0242 | 0.0250 | 0.0028 | <b><u>-0.0007</u></b> | <b><u>-0.0012</u></b> |                       |                      |                       |                       |                       |                       |                      |                       |                      |                      |                       |                      |
| SD          | 0.1130               | 0.0906 | 0.0757 | 0.0198 | 0.0246 | 0.0133 | 0.0123                | <b><u>0.0076</u></b>  | 0.0136                |                      |                       |                       |                       |                       |                      |                       |                      |                      |                       |                      |
| IA          | 0.1351               | 0.1030 | 0.0898 | 0.0262 | 0.0257 | 0.0109 | <b><u>0.0039</u></b>  | <b><u>0.0006</u></b>  | <b><u>-0.0013</u></b> | 0.0109               |                       |                       |                       |                       |                      |                       |                      |                      |                       |                      |
| MN          | 0.1397               | 0.1078 | 0.0914 | 0.0311 | 0.0314 | 0.0166 | <b><u>0.0051</u></b>  | <b><u>0.0008</u></b>  | <b><u>0.0006</u></b>  | 0.0119               | <b><u>-0.0007</u></b> |                       |                       |                       |                      |                       |                      |                      |                       |                      |
| WI          | 0.1383               | 0.1119 | 0.0976 | 0.0321 | 0.0267 | 0.0123 | <b><u>0.0058</u></b>  | <b><u>-0.0028</u></b> | <b><u>-0.0010</u></b> | <b><u>0.0040</u></b> | <b><u>0.0005</u></b>  | <b><u>-0.0010</u></b> |                       |                       |                      |                       |                      |                      |                       |                      |
| Mo-02       | 0.1601               | 0.1226 | 0.1066 | 0.0283 | 0.0328 | 0.0132 | <b><u>0.0023</u></b>  | <b><u>-0.0033</u></b> | <b><u>0.0008</u></b>  | <b><u>0.0123</u></b> | <b><u>0.0037</u></b>  | <b><u>0.0054</u></b>  | <b><u>-0.0006</u></b> |                       |                      |                       |                      |                      |                       |                      |
| IL          | 0.1270               | 0.0978 | 0.0785 | 0.0276 | 0.0268 | 0.0169 | 0.0104                | 0.0086                | 0.0074                | 0.0069               | <b><u>0.0036</u></b>  | <b><u>0.0005</u></b>  | 0.0061                | <b><u>0.0104</u></b>  |                      |                       |                      |                      |                       |                      |
| IN          | 0.1391               | 0.1111 | 0.0976 | 0.0301 | 0.0386 | 0.0152 | <b><u>0.0023</u></b>  | <b><u>0.0054</u></b>  | <b><u>0.0027</u></b>  | 0.0100               | <b><u>-0.0017</u></b> | <b><u>0.0027</u></b>  | 0.0081                | <b><u>0.0064</u></b>  | <b><u>0.0035</u></b> |                       |                      |                      |                       |                      |
| MI          | 0.1427               | 0.1170 | 0.0929 | 0.0357 | 0.0410 | 0.0164 | 0.0114                | 0.0070                | <b><u>0.0011</u></b>  | 0.0145               | <b><u>0.0027</u></b>  | <b><u>0.0002</u></b>  | <b><u>0.0073</u></b>  | <b><u>0.0044</u></b>  | <b><u>0.0028</u></b> | <b><u>0.0031</u></b>  |                      |                      |                       |                      |
| OH          | 0.1407               | 0.1086 | 0.0880 | 0.0266 | 0.0252 | 0.0108 | <b><u>0.0010</u></b>  | <b><u>-0.0006</u></b> | <b><u>-0.0016</u></b> | 0.0135               | <b><u>-0.0030</u></b> | -0.0027               | <b><u>-0.0011</u></b> | <b><u>-0.0002</u></b> | <b><u>0.0015</u></b> | <b><u>-0.0035</u></b> | <b><u>0.0005</u></b> |                      |                       |                      |
| PA          | 0.1329               | 0.1037 | 0.0887 | 0.0303 | 0.0234 | 0.0143 | <b><u>0.0049</u></b>  | <b><u>0.0035</u></b>  | <b><u>0.0048</u></b>  | 0.0169               | <b><u>0.0004</u></b>  | <b><u>0.0027</u></b>  | <b><u>0.0014</u></b>  | <b><u>0.0069</u></b>  | 0.0097               | <b><u>0.0066</u></b>  | 0.0125               | <b><u>0.0004</u></b> |                       |                      |
| DE          | 0.1456               | 0.1141 | 0.0959 | 0.0316 | 0.0276 | 0.0180 | 0.0057                | 0.0065                | 0.0069                | 0.0182               | 0.0039                | <b><u>0.0029</u></b>  | 0.0057                | <b><u>0.0087</u></b>  | 0.0080               | 0.0067                | 0.0149               | <b><u>0.0018</u></b> | 0.0038                |                      |
| NY          | 0.1410               | 0.1066 | 0.0945 | 0.0310 | 0.0242 | 0.0116 | 0.0051                | <b><u>-0.0003</u></b> | <b><u>-0.0006</u></b> | 0.0165               | <b><u>-0.0015</u></b> | <b><u>-0.0024</u></b> | <b><u>0.0001</u></b>  | <b><u>0.0030</u></b>  | 0.0077               | <b><u>0.0073</u></b>  | 0.0070               | <b><u>0.0001</u></b> | <b><u>-0.0006</u></b> | <b><u>0.0029</u></b> |

**Table S3:** Pairwise estimates of  $F_{ST}$  between all *Diabrotica virgifera virgifera* site-samples. Site-sample names are as in Figure 1 and Table S1. Underline bold  $F_{ST}$  indicates non-significant pairwise differentiation, as assessed using Fisher's exact test with correction for multiple comparisons.

| Summary statistics | Observed values | Scenario 1 | Scenario 2     | Scenario 3     | Scenario 4     | Scenario 5 | Scenario 6     |
|--------------------|-----------------|------------|----------------|----------------|----------------|------------|----------------|
| $NA_1$             | 9.23            | 0.832      | 0.949          | 0.702          | 0.725          | 0.738      | 0.918          |
| $NA_2$             | 7.85            | 0.790      | 0.843          | 0.583          | 0.593          | 0.729      | 0.778          |
| $NA_3$             | 7.46            | 0.780      | 0.749          | 0.542          | 0.537          | 0.715      | 0.679          |
| $NA_4$             | 6.23            | 0.765      | 0.625          | 0.469          | 0.466          | 0.696      | 0.533          |
| $NA_{tot}$         | 11.92           | 0.816      | 0.820          | 0.619          | 0.623          | 0.753      | 0.752          |
| $He_1$             | 0.71            | 0.696      | 0.907          | 0.515          | 0.528          | 0.581      | 0.849          |
| $He_2$             | 0.66            | 0.718      | 0.802          | 0.452          | 0.461          | 0.622      | 0.711          |
| $He_3$             | 0.65            | 0.762      | 0.702          | 0.435          | 0.431          | 0.671      | 0.601          |
| $He_4$             | 0.60            | 0.767      | 0.555          | 0.379          | 0.376          | 0.681      | 0.448          |
| $He_{tot}$         | 0.68            | 0.716      | 0.720          | 0.375          | 0.381          | 0.608      | 0.605          |
| $MGW_1$            | 0.670           | 0.175      | 0.215          | 0.064          | 0.087          | 0.067      | 0.144          |
| $MGW_2$            | 0.688           | 0.190      | 0.212          | 0.078          | 0.086          | 0.115      | 0.133          |
| $MGW_3$            | 0.665           | 0.170      | 0.161          | 0.061          | 0.052          | 0.101      | 0.088          |
| $MGW_4$            | 0.690           | 0.227      | 0.195          | 0.106          | 0.079          | 0.154      | 0.075          |
| $PA_1$             | 1.77            | 0.878      | <b>0.997</b> * | 0.941          | <b>0.964</b> * | 0.833      | <b>0.998</b> * |
| $PA_2$             | 0.69            | 0.653      | 0.779          | 0.642          | 0.649          | 0.653      | 0.784          |
| $PA_3$             | 0.54            | 0.577      | 0.490          | 0.516          | 0.511          | 0.590      | 0.492          |
| $PA_4$             | 0.08            | 0.133      | 0.087          | 0.138          | 0.148          | 0.149      | 0.107          |
| $SA$               | 3.85            | 0.800      | 0.818          | 0.604          | 0.608          | 0.734      | 0.742          |
| $F_{ST} 12$        | 0.034           | 0.292      | 0.273          | 0.345          | 0.345          | 0.301      | 0.263          |
| $F_{ST} 13$        | 0.059           | 0.323      | 0.267          | 0.464          | 0.469          | 0.340      | 0.276          |
| $F_{ST} 14$        | 0.101           | 0.392      | 0.358          | 0.609          | 0.609          | 0.411      | 0.378          |
| $F_{ST} 23$        | 0.036           | 0.309      | 0.300          | 0.360          | 0.358          | 0.305      | 0.303          |
| $F_{ST} 24$        | 0.080           | 0.394      | 0.405          | 0.546          | 0.546          | 0.396      | 0.424          |
| $F_{ST} 34$        | 0.014           | 0.120      | 0.130          | 0.194          | 0.191          | 0.114      | 0.135          |
| $L_{12}$           | -19.83          | 0.347      | 0.147          | 0.554          | 0.543          | 0.444      | 0.222          |
| $L_{13}$           | -23.10          | 0.273      | 0.109          | 0.422          | 0.406          | 0.364      | 0.167          |
| $L_{14}$           | -26.82          | 0.214      | 0.066          | 0.290          | 0.275          | 0.299      | 0.080          |
| $L_{21}$           | -17.40          | 0.369      | 0.281          | 0.649          | 0.639          | 0.470      | 0.379          |
| $L_{23}$           | -18.90          | 0.303      | 0.228          | 0.585          | 0.581          | 0.396      | 0.326          |
| $L_{24}$           | -21.21          | 0.268      | 0.193          | 0.494          | 0.494          | 0.357      | 0.264          |
| $L_{31}$           | -19.18          | 0.270      | 0.332          | 0.580          | 0.572          | 0.355      | 0.432          |
| $L_{32}$           | -17.94          | 0.281      | 0.327          | 0.626          | 0.622          | 0.380      | 0.430          |
| $L_{34}$           | -16.40          | 0.334      | 0.404          | 0.680          | 0.684          | 0.431      | 0.513          |
| $L_{41}$           | -21.83          | 0.170      | 0.352          | 0.472          | 0.468          | 0.225      | 0.454          |
| $L_{42}$           | -19.83          | 0.201      | 0.374          | 0.549          | 0.546          | 0.287      | 0.477          |
| $L_{43}$           | -14.64          | 0.355      | 0.537          | 0.742          | 0.740          | 0.456      | 0.625          |
| $AML_{12\ 3}$      | 0.308           | 0.411      | 0.388          | 0.280          | 0.280          | 0.380      | 0.386          |
| $AML_{13\ 2}$      | 0.539           | 0.621      | 0.489          | 0.553          | 0.555          | 0.602      | 0.498          |
| $AML_{23\ 1}$      | 0.724           | 0.657      | 0.544          | 0.702          | 0.704          | 0.660      | 0.562          |
| $AML_{12\ 4}$      | 0.275           | 0.364      | 0.326          | 0.241          | 0.244          | 0.335      | 0.322          |
| $AML_{14\ 2}$      | 0.650           | 0.643      | 0.466          | 0.649          | 0.645          | 0.627      | 0.494          |
| $AML_{24\ 1}$      | 0.853           | 0.761      | 0.634          | 0.823          | 0.829          | 0.763      | 0.665          |
| $AML_{13\ 4}$      | 0.048           | 0.073      | <b>0.048</b> * | <b>0.033</b> * | <b>0.032</b> * | 0.066      | <b>0.048</b> * |
| $AML_{14\ 3}$      | 0.311           | 0.427      | 0.284          | 0.272          | 0.268          | 0.405      | 0.298          |
| $AML_{34\ 1}$      | 0.868           | 0.766      | 0.719          | 0.821          | 0.823          | 0.769      | 0.737          |
| $AML_{23\ 4}$      | 0.105           | 0.131      | 0.096          | 0.080          | 0.079          | 0.126      | 0.097          |
| $AML_{24\ 3}$      | 0.384           | 0.385      | 0.257          | 0.329          | 0.324          | 0.386      | 0.269          |
| $AML_{34\ 2}$      | 0.762           | 0.620      | 0.576          | 0.714          | 0.709          | 0.632      | 0.601          |

**Table S4:** Prior checking of ABC analysis. For each summary statistic and each scenario, the proportion of simulated data (considering the total reference table) with a value below that for the observed dataset is provided. Bold with star highlights a proportion lower than 0.05 or greater than 0.95. All results (including the observed values) were obtained with the core dataset.

$NA_i$  is the mean number of alleles per locus of population  $i$  (or for all populations considered together when  $i = tot$ );  $He_i$  is the mean expected heterozygosity of population  $i$  (or for all populations considered together when  $i = tot$ );  $MGW_i$  is the mean ratio of the number of alleles to the range of allele sizes of population  $i$ ;  $PA_i$  is the mean number of private alleles per locus of population  $i$ ;  $SA$  is the mean number of shared alleles per locus between all populations;  $F_{ST} ij$  is the pairwise  $F_{ST}$  value between populations  $i$  and  $j$ ;  $L_{ij}$  is the mean individual assignment likelihood of population  $i$  being assigned to population  $j$ ;  $AML_{ij\ k}$  is the maximum likelihood estimate of admixture rate of population  $k$  with parental populations  $i$  and  $j$ .



| Parameters           | Prior distributions |         |         |         | Posterior distributions |         |         |         |
|----------------------|---------------------|---------|---------|---------|-------------------------|---------|---------|---------|
|                      | Q 2.5%              | median  | mean    | Q 97.5% | Q 2.5%                  | median  | mean    | Q 97.5% |
| Raw parameters       |                     |         |         |         |                         |         |         |         |
| $N_1$                | 119                 | 3101    | 14465   | 84279   | 1620                    | 14579   | 25748   | 91459   |
| $N_2$                | 118                 | 3235    | 14690   | 84624   | 1150                    | 5593    | 14873   | 85542   |
| $N_3$                | 120                 | 3217    | 14590   | 84669   | 1513                    | 15384   | 26698   | 92685   |
| $N_4$                | 119                 | 3197    | 14515   | 84018   | 613                     | 3395    | 12118   | 79182   |
| $NA$                 | 120                 | 3218    | 14460   | 83806   | 6894                    | 25910   | 29543   | 73625   |
| $NF_1$               | 2                   | 14      | 25      | 91      | 2                       | 7       | 13      | 72      |
| $NF_2$               | 2                   | 14      | 25      | 91      | 2                       | 12      | 22      | 90      |
| $NF_3$               | 2                   | 14      | 25      | 91      | 2                       | 6       | 11      | 49      |
| $NF_4$               | 2                   | 15      | 25      | 91      | 4                       | 30      | 36      | 94      |
| $BD_1$               | 1                   | 5       | 5.03    | 10      | 1                       | 6       | 5.66    | 10      |
| $BD_2$               | 1                   | 5       | 5.08    | 10      | 1                       | 5       | 5.53    | 10      |
| $BD_3$               | 1                   | 5       | 5.04    | 10      | 1                       | 5       | 5.36    | 10      |
| $BD_4$               | 1                   | 5       | 5.06    | 10      | 1                       | 4       | 4.53    | 10      |
| $mig_{12}$           | 1.2E-05             | 2.5E-04 | 2.5E-04 | 4.9E-04 | 8.7E-06                 | 3.1E-04 | 2.9E-04 | 4.9E-04 |
| $mig_{13}$           | 1.3E-05             | 2.5E-04 | 2.5E-04 | 4.9E-04 | 9.5E-06                 | 2.0E-04 | 2.2E-04 | 4.8E-04 |
| $mig_{14}$           | 1.3E-05             | 2.5E-04 | 2.5E-04 | 4.9E-04 | 5.3E-06                 | 2.0E-04 | 2.2E-04 | 4.8E-04 |
| $mig_{21}$           | 1.3E-05             | 2.5E-04 | 2.5E-04 | 4.9E-04 | 2.0E-05                 | 3.1E-04 | 2.9E-04 | 4.9E-04 |
| $mig_{23}$           | 1.3E-05             | 2.5E-04 | 2.5E-04 | 4.9E-04 | 1.2E-05                 | 2.7E-04 | 2.7E-04 | 4.9E-04 |
| $mig_{24}$           | 1.2E-05             | 2.5E-04 | 2.5E-04 | 4.9E-04 | 1.4E-05                 | 2.3E-04 | 2.4E-04 | 4.8E-04 |
| $mig_{31}$           | 1.2E-05             | 2.5E-04 | 2.5E-04 | 4.9E-04 | 1.5E-05                 | 2.7E-04 | 2.7E-04 | 4.9E-04 |
| $mig_{32}$           | 1.3E-05             | 2.5E-04 | 2.5E-04 | 4.9E-04 | 1.7E-05                 | 2.2E-04 | 2.3E-04 | 4.9E-04 |
| $mig_{34}$           | 1.2E-05             | 2.5E-04 | 2.5E-04 | 4.9E-04 | 2.3E-05                 | 3.2E-04 | 3.0E-04 | 4.9E-04 |
| $mig_{41}$           | 1.2E-05             | 2.5E-04 | 2.5E-04 | 4.9E-04 | 6.2E-06                 | 1.3E-04 | 1.6E-04 | 4.6E-04 |
| $mig_{42}$           | 1.2E-05             | 2.5E-04 | 2.5E-04 | 4.9E-04 | 6.8E-06                 | 2.0E-04 | 2.1E-04 | 4.9E-04 |
| $mig_{43}$           | 1.3E-05             | 2.5E-04 | 2.5E-04 | 4.9E-04 | 1.4E-05                 | 2.7E-04 | 2.6E-04 | 4.8E-04 |
| $tMrec_1$            | 360                 | 1031    | 998.2   | 1477    | 318                     | 1002    | 969.3   | 1471    |
| $tMrec_2$            | 222                 | 603     | 648.3   | 1280    | 205                     | 500     | 558.2   | 1195    |
| $tMrec_3$            | 164                 | 351     | 407.0   | 944     | 163                     | 279     | 305.5   | 613     |
| $tMrec_4$            | 141                 | 203     | 244.0   | 581     | 140                     | 181     | 199.8   | 355     |
| Mean $\mu$           | 3.5E-05             | 5.0E-04 | 5.0E-04 | 9.8E-04 | 1.6E-04                 | 6.0E-04 | 6.0E-04 | 9.8E-04 |
| Mean $P$             | 0.105               | 0.201   | 0.200   | 0.295   | 0.106                   | 0.198   | 0.201   | 0.297   |
| Composite parameters |                     |         |         |         |                         |         |         |         |
| $N_{1\mu}$           | 0.02                | 1.22    | 7.26    | 51.88   | 0.71                    | 6.99    | 14.86   | 72.50   |
| $N_{2\mu}$           | 0.02                | 1.24    | 7.38    | 52.46   | 0.40                    | 2.41    | 6.12    | 43.66   |
| $N_{3\mu}$           | 0.02                | 1.25    | 7.32    | 52.87   | 0.57                    | 6.28    | 12.45   | 57.93   |
| $N_{4\mu}$           | 0.02                | 1.22    | 7.35    | 52.88   | 0.22                    | 1.38    | 5.10    | 42.27   |
| $NA_{\mu}$           | 0.02                | 1.25    | 7.32    | 51.99   | 2.81                    | 13.41   | 15.31   | 47.33   |
| $NF_{1\mu}$          | 2.7E-04             | 5.6E-03 | 1.3E-02 | 6.2E-02 | 7.1E-04                 | 4.2E-03 | 8.2E-03 | 4.3E-02 |
| $NF_{2\mu}$          | 2.7E-04             | 5.6E-03 | 1.3E-02 | 6.2E-02 | 8.4E-04                 | 6.5E-03 | 1.3E-02 | 5.5E-02 |
| $NF_{3\mu}$          | 2.7E-04             | 5.6E-03 | 1.3E-02 | 6.2E-02 | 6.9E-04                 | 3.5E-03 | 6.3E-03 | 2.9E-02 |
| $NF_{4\mu}$          | 2.6E-04             | 5.6E-03 | 1.3E-02 | 6.2E-02 | 1.3E-03                 | 1.7E-02 | 2.3E-02 | 7.3E-02 |
| $BNsev_1$            | 10                  | 911     | 9247    | 83311   | 562                     | 13299   | 28500   | 131977  |
| $BNsev_2$            | 10                  | 916     | 9268    | 82459   | 283                     | 7016    | 17359   | 93460   |
| $BNsev_3$            | 10                  | 907     | 9291    | 80417   | 191                     | 6202    | 16769   | 85477   |
| $BNsev_4$            | 10                  | 912     | 9375    | 85043   | 131                     | 2294    | 5249    | 30274   |
| $M_{12}$             | 0.01                | 0.59    | 3.64    | 26.28   | 0.20                    | 3.56    | 7.13    | 33.06   |
| $M_{13}$             | 0.01                | 0.58    | 3.65    | 26.51   | 0.09                    | 1.81    | 4.80    | 33.33   |
| $M_{14}$             | 0.01                | 0.59    | 3.64    | 26.21   | 0.04                    | 1.39    | 3.91    | 23.98   |
| $M_{21}$             | 0.01                | 0.59    | 3.68    | 26.41   | 0.09                    | 2.17    | 5.21    | 28.44   |
| $M_{23}$             | 0.01                | 0.60    | 3.69    | 26.68   | 0.08                    | 1.47    | 3.66    | 22.18   |
| $M_{24}$             | 0.01                | 0.61    | 3.68    | 26.48   | 0.08                    | 1.07    | 3.35    | 21.71   |
| $M_{31}$             | 0.01                | 0.59    | 3.64    | 26.39   | 0.13                    | 3.70    | 7.40    | 34.34   |
| $M_{32}$             | 0.01                | 0.59    | 3.64    | 26.22   | 0.16                    | 3.27    | 6.11    | 28.02   |
| $M_{34}$             | 0.01                | 0.60    | 3.62    | 26.10   | 0.13                    | 3.76    | 8.12    | 34.91   |
| $M_{41}$             | 0.01                | 0.59    | 3.62    | 26.22   | 0.01                    | 0.45    | 1.65    | 12.82   |
| $M_{42}$             | 0.01                | 0.59    | 3.62    | 25.82   | 0.01                    | 0.53    | 1.73    | 13.32   |
| $M_{43}$             | 0.01                | 0.60    | 3.64    | 26.42   | 0.03                    | 0.72    | 3.56    | 25.55   |

**Table S5:** Prior and posterior distributions of all parameters and several composite parameters of scenario 1. Notes about composite parameters:  $NA_{\mu}$  and  $N_{i\mu}$  = effective population size (number of diploid individuals) of the ancestral unsampled population and of population  $i$  respectively, multiplied by the mean mutation rate  $\mu$ ;  $NF_{i\mu}$  = effective number of founders during the bottleneck of population  $i$ , multiplied by the mean mutation rate  $\mu$ ;  $BNsev_i$  = bottleneck severity of population  $i$  computed as  $[BD_i \times N_{parental\ population\ of\ population\ i}) / NF_i]$ , with parental populations being populations A, 1, 2 and 3 for populations 1, 2, 3 and 4 respectively;  $M_{ij}$  is the effective number of migrants per generation from population  $i$  to population  $j$  backward in time, computed as  $m_{ij} \times N_i$ .
